# Supplementary material for: Bone metastasis in non-small-cell lung cancer: genomic characterization and exploration of potential targets
Source: PubMed Central journal article supplement — Ther Adv Med Oncol. 2024 Mar 19;16:17588359241239293. doi: 10.1177/17588359241239293 (PMC10953105; doi:10.1177/17588359241239293), 2024-03-19
Supplement: sj-pdf-1-tam-10.1177_17588359241239293.pdf [file sj-pdf-1-tam-10.1177_17588359241239293.pdf]

| ORDER ID   | Gene    | VAR_TYPE_SX      | VAF    |
|------------|---------|------------------|--------|
| 11T004971A | HDAC9   | Substitution/Inc | 0.103  |
| 11T004971A | CTNNA3  | Substitution/Inc | 0.195  |
| 11T004971A | ATM     | Substitution/Inc | 0.148  |
| 11T004971A | KMT2A   | Substitution/Inc | 0.129  |
| 11T004971A | KRAS    | Substitution/Inc | 0.458  |
| 11T004971A | FLT1    | Substitution/Inc | 0.221  |
| 11T004971A | MCF2L   | Substitution/Inc | 0.164  |
| 11T004971A | FANCM   | Substitution/Inc | 0.165  |
| 11T004971A | TP53    | Truncation       | 0.272  |
| 11T004971A | SMAD4   | Substitution/Inc | 0.271  |
| 11T004971A | JAK3    | Substitution/Inc | 0.152  |
| 11T004971A | AXL     | Substitution/Inc | 0.188  |
| 11T004971A | AXL     | Substitution/Inc | 0.182  |
| 11T004971A | BUB1    | Gene Amplificat  | -      |
| 11T004971A | BCL2L11 | Gene Amplificat  | -      |
| 11T004971A | MERTK   | Gene Amplificat  | -      |
| 11T004971A | PIK3C2G | Gene Amplificat  | -      |
| 11T004971A | RECQL   | Gene Amplificat  | -      |
| 11T004971A | KRAS    | Gene Amplificat  | -      |
| 11T004971A | RAD54L  | Substitution/Inc | 0.214  |
| 11T004971A | JUN     | Truncation       | 0.16   |
| 11T004971A | CD1E    | Substitution/Inc | 0.112  |
| 11T004971A | LRP1B   | Substitution/Inc | 0.089  |
| 11T004971A | ARID1B  | Substitution/Inc | 0.116  |
| 11T004972A | EPHB1   | Substitution/Inc | -      |
| 11T004972A | DPYD    | Substitution/Inc | 0.53   |
| 11T004972A | PIK3CB  | Substitution/Inc | 0.162  |
| 11T004972A | APC     | Substitution/Inc | 0.547  |
| 11T004972A | EGFR    | Substitution/Inc | 0.264  |
| 11T004972A | MET     | Substitution/Inc | 0.33   |
| 11T004972A | PRKDC   | Substitution/Inc | 0.472  |
| 11T004972A | PRKDC   | Truncation       | 0.14   |
| 11T004972A | PRKDC   | Substitution/Inc | 0.484  |
| 11T004972A | MAML2   | Substitution/Inc | 0.405  |
| 11T004972A | ARID2   | Substitution/Inc | 0.146  |
| 11T004972A | ERBB3   | Substitution/Inc | 0.489  |
| 11T004972A | XRCC3   | Substitution/Inc | 0.506  |
| 11T004972A | TYRO3   | Substitution/Inc | 0.631  |
| 11T004972A | TP53    | Substitution/Inc | 0.187  |
| 11T004972A | MUC16   | Substitution/Inc | 0.34   |
| 11T004972A | NOTCH3  | Substitution/Inc | 0.178  |
| 11T004972A | BCR     | Substitution/Inc | 0.49   |
| 11T004972A | TRIO    | Substitution/Inc | 0.225  |
| 11T004972A | NRG1    | Fusion/Rearrang  | -      |
| 11T004972A | NRG1    | Fusion/Rearrang  | -      |
| 11T004973A | TP53    | Substitution/Inc | 0.2785 |
| 11T004973A | SDHB    | Substitution/Inc | 0.249  |
| 11T004973A | ABL2    | Substitution/Inc | 0.36   |
| 11T004973A | KDR     | Substitution/Inc | 0.193  |
| 11T004973A | ADAM29  | Substitution/Inc | 0.225  |
| 11T004973A | KRAS    | Substitution/Inc | 0.547  |
| 11T004973A | MDM2    | Substitution/Inc | 0.318  |
| 11T004973A | CHD2    | Substitution/Inc | 0.162  |
| 11T004973A | STK11   | Substitution/Inc | 0.36   |
| 11T004973A | KEAP1   | Substitution/Inc | 0.392  |
| 11T004973A | LRIG1   | Gene Amplificat  | -      |
| 11T004973A | MITF    | Gene Amplificat  | -      |

|            |         |                  |        |
|------------|---------|------------------|--------|
| 11T004973A | FOXP1   | Gene Amplificat  | -      |
| 11T004973A | SHQ1    | Gene Amplificat  | -      |
| 11T004973A | MYBL1   | Gene Amplificat  | -      |
| 11T004973A | PREX2   | Gene Amplificat  | -      |
| 11T004973A | NCOA2   | Gene Amplificat  | -      |
| 11T004973A | MSC     | Gene Amplificat  | -      |
| 11T004973A | NBN     | Gene Amplificat  | -      |
| 11T004973A | RUNX1T1 | Gene Amplificat  | -      |
| 11T004973A | MYC     | Gene Amplificat  | -      |
| 11T004974A | TERT    | Substitution/Inc | 0.196  |
| 11T004974A | MAP2K4  | Truncation       | 0.017  |
| 11T004974A | ERBB2   | Substitution/Inc | 0.253  |
| 11T004974A | MUC16   | Substitution/Inc | 0.098  |
| 11T004974A | MDM2    | Gene Amplificat  | -      |
| 11T004974A | FRS2    | Gene Amplificat  | -      |
| 11T004975A | SLC34A2 | Substitution/Inc | 0.224  |
| 11T004975A | EGFR    | Substitution/Inc | 0.417  |
| 11T004975A | FANCA   | Substitution/Inc | 0.013  |
| 11T004975A | TP53    | Substitution/Inc | 0.225  |
| 11T004975A | SDHA    | Gene Amplificat  | -      |
| 11T004975A | TERT    | Gene Amplificat  | -      |
| 11T004975A | ITK     | Gene Amplificat  | -      |
| 11T004975A | CDK6    | Gene Amplificat  | -      |
| 11T004975A | EZH2    | Gene Amplificat  | -      |
| 11T004975A | RHEB    | Gene Amplificat  | -      |
| 11T004975A | KMT2C   | Gene Amplificat  | -      |
| 11T004975A | NFKBIA  | Gene Amplificat  | -      |
| 11T004975A | NKX2-1  | Gene Amplificat  | -      |
| 11T004975A | FOXA1   | Gene Amplificat  | -      |
| 11T004976A | TNFAIP3 | Substitution/Inc | 0.038  |
| 11T004976A | EGFR    | Substitution/Inc | 0.809  |
| 11T004976A | PPP2R2A | Substitution/Inc | 0.01   |
| 11T004976A | FAT3    | Substitution/Inc | 0.02   |
| 11T004976A | TP53    | Truncation       | 0.176  |
| 11T004976A | RAD51C  | Substitution/Inc | 0.022  |
| 11T004976A | SMARCA4 | Substitution/Inc | 0.049  |
| 11T004976A | RBM10   | Truncation       | 0.154  |
| 11T004976A | BCORL1  | Substitution/Inc | 0.065  |
| 11T004976A | SDHA    | Gene Amplificat  | -      |
| 11T004976A | TERT    | Gene Amplificat  | -      |
| 11T004976A | TRIO    | Gene Amplificat  | -      |
| 11T004976A | EGFR    | Gene Amplificat  | -      |
| 11T004976A | KAT6A   | Gene Amplificat  | -      |
| 11T004976A | POLB    | Gene Amplificat  | -      |
| 11T004977A | TSPAN31 | Substitution/Inc | 0.0966 |
| 11T004977A | LRP1B   | Substitution/Inc | 0.073  |
| 11T004977A | FAT4    | Substitution/Inc | 0.035  |
| 11T004977A | RASA1   | Substitution/Inc | 0.053  |
| 11T004977A | TFEB    | Substitution/Inc | 0.074  |
| 11T004977A | EGFR    | Substitution/Inc | 0.252  |
| 11T004977A | FANCG   | Substitution/Inc | 0.02   |
| 11T004977A | ATM     | Substitution/Inc | 0.015  |
| 11T004977A | TYRO3   | Substitution/Inc | 0.04   |
| 11T004977A | SOCS1   | Substitution/Inc | 0.068  |
| 11T004977A | NF1     | Substitution/Inc | 0.05   |
| 11T004977A | MUC16   | Substitution/Inc | 0.011  |
| 11T004977A | AR      | Substitution/Inc | 0.058  |
| 11T004977A | MED12   | Substitution/Inc | 0.01   |

|            |          |                  |        |
|------------|----------|------------------|--------|
| 11T004977A | TAF1     | Substitution/Inc | 0.064  |
| 11T004977A | PIK3CB   | Gene Amplificat  | -      |
| 11T004977A | FOXL2    | Gene Amplificat  | -      |
| 11T004977A | MECOM    | Gene Amplificat  | -      |
| 11T004977A | TERC     | Gene Amplificat  | -      |
| 11T004977A | PRKCI    | Gene Amplificat  | -      |
| 11T004977A | FNDC3B   | Gene Amplificat  | -      |
| 11T004977A | ECT2     | Gene Amplificat  | -      |
| 11T004977A | PIK3CA   | Gene Amplificat  | -      |
| 11T004977A | KLHL6    | Gene Amplificat  | -      |
| 11T004977A | NAB2     | Gene Amplificat  | -      |
| 11T004977A | STAT6    | Gene Amplificat  | -      |
| 11T004977A | LRP1     | Gene Amplificat  | -      |
| 11T004977A | GLI1     | Gene Amplificat  | -      |
| 11T004977A | ARHGEF25 | Gene Amplificat  | -      |
| 11T004977A | TSPAN31  | Gene Amplificat  | -      |
| 11T004977A | CDK4     | Gene Amplificat  | -      |
| 11T004977A | SRGAP1   | Gene Amplificat  | -      |
| 11T004977A | HMGA2    | Gene Amplificat  | -      |
| 11T004977A | MDM2     | Gene Amplificat  | -      |
| 11T004977A | PRKAR1A  | Fusion/Rearrang  | -      |
| 11T004978A | MTOR     | Substitution/Inc | 0.135  |
| 11T004978A | TACSTD2  | Substitution/Inc | 0.082  |
| 11T004978A | AKT3     | Substitution/Inc | 0.07   |
| 11T004978A | PDGFRA   | Substitution/Inc | 0.096  |
| 11T004978A | ARID1B   | Substitution/Inc | 0.337  |
| 11T004978A | MET      | Substitution/Inc | 0.09   |
| 11T004978A | MET      | Substitution/Inc | 0.509  |
| 11T004978A | FAM135B  | Substitution/Inc | 0.061  |
| 11T004978A | CDKN2A   | Substitution/Inc | 0.016  |
| 11T004978A | RXRA     | Substitution/Inc | 0.028  |
| 11T004978A | FAT3     | Substitution/Inc | 0.141  |
| 11T004978A | KDM5A    | Truncation       | 0.094  |
| 11T004978A | SRGAP1   | Substitution/Inc | 0.1    |
| 11T004978A | FLT3     | Substitution/Inc | 0.138  |
| 11T004978A | MCF2L    | Substitution/Inc | 0.017  |
| 11T004978A | BCR      | Substitution/Inc | 0.139  |
| 11T004978A | ROCK2    | Gene Amplificat  | -      |
| 11T004978A | AR       | Substitution/Inc | 0.097  |
| 11T004978A | GEN1     | Gene Amplificat  | -      |
| 11T004978A | CREB3L2  | Gene Amplificat  | -      |
| 11T004978A | BRAF     | Gene Amplificat  | -      |
| 11T004978A | EZH2     | Gene Amplificat  | -      |
| 11T004978A | ARHGEF25 | Gene Amplificat  | -      |
| 11T004978A | TSPAN31  | Gene Amplificat  | -      |
| 11T004978A | CDK4     | Gene Amplificat  | -      |
| 11T004978A | HMGA2    | Gene Amplificat  | -      |
| 11T004978A | MDM2     | Gene Amplificat  | -      |
| 11T004978A | FRS2     | Gene Amplificat  | -      |
| 11T004978A | SIK1     | Fusion/Rearrang  | -      |
| 11T004979A | LZTR1    | Substitution/Inc | 0.0094 |
| 11T004979A | LRP2     | Substitution/Inc | 0.015  |
| 11T004979A | ECT2     | Truncation       | 0.058  |
| 11T004979A | EGFR     | Substitution/Inc | 0.048  |
| 11T004979A | EPHB4    | Substitution/Inc | 0.029  |
| 11T004979A | MYC      | Gene Amplificat  | -      |
| 11T004979A | FAM135B  | Gene Amplificat  | -      |
| 11T004979A | TP53     | Substitution/Inc | 0.057  |

|            |          |                  |        |
|------------|----------|------------------|--------|
| 11T004979A | PTK2     | Gene Amplificat  | -      |
| 11T004979A | STK11    | Substitution/Inc | 0.065  |
| 11T004979A | BCL2L11  | Substitution/Inc | 0.5505 |
| 11T004980A | NFE2L2   | Substitution/Inc | 0.0213 |
| 11T004980A | EPHA7    | Substitution/Inc | 0.0652 |
| 11T004980A | PRDM1    | Gene Amplificat  | -      |
| 11T004980A | EPHA2    | Substitution/Inc | 0.028  |
| 11T004980A | NSD3     | Gene Amplificat  | -      |
| 11T004980A | NSD3     | Fusion/Rearrang  | -      |
| 11T004980A | CD1C     | Truncation       | 0.105  |
| 11T004980A | FGFR1    | Gene Amplificat  | -      |
| 11T004980A | FOXA1    | Fusion/Rearrang  | -      |
| 11T004980A | LRP1B    | Substitution/Inc | 0.046  |
| 11T004980A | LRP2     | Substitution/Inc | 0.064  |
| 11T004980A | SOX2     | Substitution/Inc | 0.045  |
| 11T004980A | FAT4     | Substitution/Inc | 0.032  |
| 11T004980A | SKP2     | Substitution/Inc | 0.056  |
| 11T004980A | PIK3R1   | Substitution/Inc | 0.051  |
| 11T004980A | H3C2     | Substitution/Inc | 0.064  |
| 11T004980A | PIM1     | Substitution/Inc | 0.036  |
| 11T004980A | CARD11   | Substitution/Inc | 0.11   |
| 11T004980A | EGFR     | Substitution/Inc | 0.054  |
| 11T004980A | PIK3CG   | Truncation       | 0.093  |
| 11T004980A | ADGRA2   | Substitution/Inc | 0.099  |
| 11T004980A | PAX5     | Substitution/Inc | 0.065  |
| 11T004980A | FAT3     | Substitution/Inc | 0.035  |
| 11T004980A | GREM1    | Substitution/Inc | 0.03   |
| 11T004980A | TP53     | Truncation       | 0.057  |
| 11T004980A | NF1      | Truncation       | 0.03   |
| 11T004980A | CHEK2    | Substitution/Inc | 0.031  |
| 11T004980A | BMX      | Substitution/Inc | 0.071  |
| 11T004981A | ETV1     | Substitution/Inc | 0.0361 |
| 11T004981A | CCNE1    | Gene Amplificat  | -      |
| 11T004981A | ARHGEF10 | Fusion/Rearrang  | -      |
| 11T004981A | MTOR     | Substitution/Inc | 0.159  |
| 11T004981A | CD1B     | Substitution/Inc | 0.069  |
| 11T004981A | MR1      | Truncation       | 0.107  |
| 11T004981A | PHOX2B   | Substitution/Inc | 0.234  |
| 11T004981A | EPHA5    | Substitution/Inc | 0.189  |
| 11T004981A | EGFR     | Substitution/Inc | 0.295  |
| 11T004981A | TP53     | Substitution/Inc | 0.594  |
| 11T004981A | HCK      | Substitution/Inc | 0.165  |
| 11T004981A | KDM6A    | Substitution/Inc | 0.2    |
| 11T004981A | CCNB3    | Substitution/Inc | 0.057  |
| 11T004982A | RIT1     | Gene Amplificat  | -      |
| 11T004982A | IKZF1    | Gene Amplificat  | -      |
| 11T004982A | EGFR     | Gene Amplificat  | -      |
| 11T004982A | LIMK1    | Gene Amplificat  | -      |
| 11T004982A | DLC1     | Gene Homozyg     | -      |
| 11T004982A | CDKN2A   | Gene Homozyg     | -      |
| 11T004982A | CDKN2B   | Gene Homozyg     | -      |
| 11T004982A | ARID1A   | Substitution/Inc | 0.1    |
| 11T004982A | PRKACB   | Substitution/Inc | 0.084  |
| 11T004982A | CTNNB1   | Substitution/Inc | 0.143  |
| 11T004982A | PIK3CB   | Truncation       | 0.113  |
| 11T004982A | CARD11   | Substitution/Inc | 0.107  |
| 11T004982A | EGFR     | Substitution/Inc | 0.685  |
| 11T004982A | KMT2C    | Truncation       | 0.011  |

|            |          |                  |        |
|------------|----------|------------------|--------|
| 11T004982A | RBM10    | Truncation       | 0.476  |
| 11T004984A | SPEN     | Substitution/Inc | 0.091  |
| 11T004984A | LCK      | Substitution/Inc | 0.085  |
| 11T004984A | PBRM1    | Truncation       | 0.087  |
| 11T004984A | ETV5     | Substitution/Inc | 0.085  |
| 11T004984A | APC      | Truncation       | 0.117  |
| 11T004984A | IRF4     | Substitution/Inc | 0.1    |
| 11T004984A | EGFR     | Substitution/Inc | 0.183  |
| 11T004984A | EGFR     | Substitution/Inc | 0.19   |
| 11T004985A | RET      | Fusion/Rearrang  | -      |
| 11T004985A | LRP1B    | Substitution/Inc | 0.298  |
| 11T004985A | FAM135B  | Substitution/Inc | 0.304  |
| 11T004986A | VGLL3    | Fusion/Rearrang  | -      |
| 11T004986A | MITF     | Gene Amplificat  | -      |
| 11T004986A | FOXP1    | Gene Amplificat  | -      |
| 11T004986A | VGLL3    | Gene Amplificat  | -      |
| 11T004986A | HDAC9    | Gene Amplificat  | -      |
| 11T004986A | EGFR     | Gene Amplificat  | -      |
| 11T004986A | MET      | Gene Amplificat  | -      |
| 11T004986A | EZH2     | Gene Amplificat  | -      |
| 11T004986A | RHEB     | Gene Amplificat  | -      |
| 11T004986A | ERBB3    | Gene Amplificat  | -      |
| 11T004986A | NAB2     | Gene Amplificat  | -      |
| 11T004986A | STAT6    | Gene Amplificat  | -      |
| 11T004986A | LRP1     | Gene Amplificat  | -      |
| 11T004986A | GLI1     | Gene Amplificat  | -      |
| 11T004986A | ARHGEF25 | Gene Amplificat  | -      |
| 11T004986A | TSPAN31  | Gene Amplificat  | -      |
| 11T004986A | CDK4     | Gene Amplificat  | -      |
| 11T004986A | NF2      | Gene Amplificat  | -      |
| 11T004986A | PIK3CD   | Substitution/Inc | 0.108  |
| 11T004986A | DNMT3A   | Substitution/Inc | 0.013  |
| 11T004986A | REL      | Truncation       | 0.083  |
| 11T004986A | GLI2     | Substitution/Inc | 0.05   |
| 11T004986A | PRKCI    | Substitution/Inc | 0.016  |
| 11T004986A | NOTCH4   | Substitution/Inc | 0.075  |
| 11T004986A | TNFAIP3  | Substitution/Inc | 0.049  |
| 11T004986A | EGFR     | Substitution/Inc | 0.683  |
| 11T004986A | GTF2I    | Substitution/Inc | 0.285  |
| 11T004986A | RUNX1T1  | Substitution/Inc | 0.234  |
| 11T004986A | PTK2     | Substitution/Inc | 0.112  |
| 11T004986A | TET1     | Substitution/Inc | 0.149  |
| 11T004986A | PTPRO    | Substitution/Inc | 0.22   |
| 11T004986A | TP53     | Truncation       | 0.379  |
| 11T004986A | SMARCA4  | Substitution/Inc | 0.109  |
| 11T004986A | CIC      | Truncation       | 0.038  |
| 11T004986A | BCORL1   | Substitution/Inc | 0.115  |
| 11T004986A | MLH1     | Substitution/Inc | 0.478  |
| 11T004987A | LRP1B    | Substitution/Inc | 0.0896 |
| 11T004987A | LRP1     | Substitution/Inc | 0.0032 |
| 11T004987A | NCOR1    | Fusion/Rearrang  | -      |
| 11T004987A | EPHA3    | Gene Homozyg     | -      |
| 11T004987A | ZNF703   | Gene Amplificat  | -      |
| 11T004987A | ADGRA2   | Gene Amplificat  | -      |
| 11T004987A | NSD3     | Gene Amplificat  | -      |
| 11T004987A | FGFR1    | Gene Amplificat  | -      |
| 11T004987A | IDO1     | Gene Amplificat  | -      |
| 11T004987A | KAT6A    | Gene Amplificat  | -      |

|            |        |                  |       |
|------------|--------|------------------|-------|
| 11T004987A | POLB   | Gene Amplificat  | -     |
| 11T004987A | AKT2   | Gene Amplificat  | -     |
| 11T004987A | CIC    | Gene Amplificat  | -     |
| 11T004987A | RELB   | Gene Amplificat  | -     |
| 11T004987A | ERCC2  | Gene Amplificat  | -     |
| 11T004987A | ERCC1  | Gene Amplificat  | -     |
| 11T004987A | FANCD2 | Substitution/Inc | 0.48  |
| 11T004987A | PIK3CA | Substitution/Inc | 0.164 |
| 11T004987A | CDKN1A | Substitution/Inc | 0.02  |
| 11T004987A | GRM3   | Substitution/Inc | 0.436 |
| 11T004987A | GRM3   | Substitution/Inc | 0.018 |
| 11T004987A | PIK3CG | Substitution/Inc | 0.426 |
| 11T004987A | BLK    | Substitution/Inc | 0.404 |
| 11T004987A | FGFR2  | Substitution/Inc | 0.017 |
| 11T004987A | WEE1   | Truncation       | 0.036 |
| 11T004987A | TP53   | Substitution/Inc | 0.391 |
| 11T004987A | MUC16  | Substitution/Inc | 0.272 |
| 11T004987A | ASXL1  | Truncation       | 0.191 |
| 11T004987A | ATRX   | Substitution/Inc | 0.505 |
